# **A retrospective analysis of gender parity in scientific authorship in a biomedical research centre**

Rinita Dam<sup>1\*</sup>, [rinita.dam@rdm.ox.ac.uk](mailto:rinita.dam@rdm.ox.ac.uk) \* Corresponding author

Syed Ghulam Sarwar Shah<sup>1, 2\*</sup>, [Sarwar.Shah@ouh.nhs.uk](mailto:Sarwar.Shah@ouh.nhs.uk) \* Corresponding author

Maria Julia Milano<sup>1\*</sup>, [colomilano@gmail.com](mailto:colomilano@gmail.com)

Laurel D Edmunds<sup>1</sup>, [laureledmunds@gmail.com](mailto:laureledmunds@gmail.com)

Lorna R Henderson<sup>1, 2</sup>, [lorna.henderson@ouh.nhs.uk](mailto:lorna.henderson@ouh.nhs.uk)

Catherine R Hartley<sup>3</sup>, [Catherine.hartley@bodleian.ox.ac.uk](mailto:Catherine.hartley@bodleian.ox.ac.uk)

Owen Coxall<sup>3</sup>, [owen.coxall@bodleian.ox.ac.uk](mailto:owen.coxall@bodleian.ox.ac.uk)

Pavel V Ovseiko<sup>1</sup>, [pavel.ovseiko@rdm.ox.ac.uk](mailto:pavel.ovseiko@rdm.ox.ac.uk)

Alastair M Buchan<sup>1</sup>, [alastair.buchan@medsci.ox.ac.uk](mailto:alastair.buchan@medsci.ox.ac.uk)

Vasiliki Kiparoglou<sup>2,4</sup>, [vasiliki.kiparoglou@ouh.nhs.uk](mailto:vasiliki.kiparoglou@ouh.nhs.uk)

## **Author institutional addresses**

<sup>1</sup> Radcliffe Department of Medicine. Medical Sciences Division, University of Oxford, Oxford, United Kingdom.

<sup>2</sup> National Institute for Health Research Oxford Biomedical Research Centre, Oxford University Hospitals NHS Foundation Trust, Oxford, United Kingdom.

<sup>3</sup> Bodleian Health Care Libraries, University of Oxford, Oxford, United Kingdom.

<sup>4</sup> Nuffield Department of Primary Health Care Sciences University of Oxford, Oxford.

+RD, SGSS and MJM contributed equally to this paper and are joint first authors on this work.

Word count: 4377 (excluding references)



## 22 ABSTRACT

23 **Objective:** Scientific authorship is a vital marker of success in academic careers and gender equity is  
24 a key performance metric in research. However, there is little understanding of gender equity in  
25 publications in biomedical research centres funded by the National Institute for Health Research  
26 (NIHR). This study assesses the gender parity in scientific authorship of biomedical research.  
27

28 **Design:** A retrospective descriptive study.

29 **Setting:** NIHR Oxford Biomedical Research Centre.

30 **Data:** 2409 publications accepted or published from 1 April 2012 to 31 March 2017.

31 **Main outcome measures:** Gender of authors, defined as a binary variable comprising either male or  
32 female categories, in six authorship categories: first author, joint first authors, first corresponding  
33 author, joint corresponding authors, last author and joint last authors.

34 **Results:** Publications comprised clinical research (39%, n=939), basic research (27%, n=643), and  
35 other types of research (34%, n=827). The proportion of female authors as first author (41%), first  
36 corresponding authors (34%) and last author (23%) was statistically significantly lower than male  
37 authors in these authorship categories. Of total joint first authors (n=458), joint corresponding  
38 authors (n=169), and joint last authors (n=229), female only authors comprised statistically  
39 significant smaller proportions i.e. 15% (n=69), 29% (n=49) and 10% (n=23) respectively, compared  
40 to male only authors in these joint authorship categories. There was a statistically significant  
41 association between gender of the last author(s) with gender of the first author(s) ( $\chi^2$  33.742,  $P <$   
42 0.001), corresponding author(s) ( $\chi^2$  540.774,  $P <$  0.001) and joint last author(s) ( $\chi^2$  91.291,  $P <$  0.001).

43 **Conclusions:** Although there are increasing trends of female authors as first authors (41%) and last  
44 authors (23%), female authors are underrepresented compared to male authors in all six categories  
45 of scientific authorship in biomedical research. Further research is needed to encourage gender  
46 parity in different categories of scientific authorship.



## 47     **Strengths and limitations of this study**

- 48        • This is the first study to investigate gender parity in six categories of scientific authorship:  
49           first authors, first corresponding authors, last authors and three joint authorship categories  
50           i.e. joint first authors, joint corresponding authors and joint last authors in biomedical  
51           research.
- 52        • This study provides an important benchmark on gender equity in scientific authorship for  
53           other NIHR funded centres and organisations in England.
- 54        • The generalisability of the findings of this study may be limited due to differences in medical  
55           specialties, research areas, institutional cultures, and levels of support to individual  
56           researchers.
- 57        • Using secondary sources for determining the gender of authors may have limitations, which  
58           could be avoided by seeking relevant information from original authors and institution  
59           affiliation at the time of submission.

60

61     **Keywords:** Responsible Research and Innovation, Gender Equity, Scientific Authorship, National  
62     Institution for Health Research, Biomedical Research Centres, Evaluation, Translational Research  
63     Organisations, Translational Research, Basic Science Research.



## 64 INTRODUCTION

65 Promoting Responsible Research and Innovation (RRI) is a major strategy of the “Science with and  
66 for Society” work programme of the European Union’s (EU) Horizon 2020 Framework Programme  
67 for Research and Innovation[1]. RRI aims to build capacity and develop innovative ways to connect  
68 science to society[2]. The RRI approach enables all societal members (such as researchers, citizens,  
69 policymakers, businesses and third sector organisations) to work together during the research and  
70 innovation process in order to better align research and innovation with the values, needs and  
71 expectations of the society[1,2]. The RRI strategy includes the “keys” of public engagement, open  
72 access, gender, ethics and science education, and two further “keys”: sustainability and social  
73 justice, which have been added recently [3]. The idea is that by prioritising these key components of  
74 RRI, it would help make science more attractive to young people and society, and raise awareness of  
75 the meaning of responsible science[2].

76 We have focussed on the ‘gender’ element of the RRI because it is imperative to advance gender  
77 equality within research institutions, as well as within the design and content of research and  
78 innovation[1]. The issue of enhancing female participation in economic decision-making has become  
79 prominent in the national, European and international spheres, with a particular focus on the  
80 economic dimension of gender diversity[4]. In order to achieve a fair female participation within  
81 positions of power, it is recommended that women should hold half of the total seats in board  
82 rooms[5], however, a ratio between 40% and 60%, also known as a “gender balance zone”[6], is  
83 considered acceptable – a threshold that is set by the European Commission[4].

84 From the perspective of gender equality in academia and scientific research, gender parity in  
85 scientific authorship is an important measure of achievement. The term gender parity refers to “the  
86 equal contribution of women and men to different dimensions of life” and it is operationalised as a  
87 “relative equality in terms of numbers and proportions of women and men” for a particular  
88 indicator”[7]. Gender (dis)parity in scientific authorship has important implications for gender equity  
89 in academic advancement[8] because scientific authorship is commonly used as a measure of  
90 academic productivity that is used for performance management, reward, and recognition[9,10].  
91 The acceleration of women’s advancement and leadership in research is one of the stated objectives  
92 of the National Institute of Health Research (NIHR) in the United Kingdom (UK) and it is imperative  
93 for the RRI in the wider European research area. Yet, there is limited research concerning gender  
94 equity in scientific authorship of translational research funded through NIHR biomedical research  
95 centres (BRCs).

96 In the UK, women currently outnumber men in medical schools[11], however, a persistent gender  
97 disparity in scientific publications remains[10,12–23]. While the proportion of women as first and  
98 senior authors of original medical research has increased over the past few decades[24], women are  
99 still significantly underrepresented as authors of research articles in medical journals, especially as  
100 first and senior authors[14,22,23,25]. For example, in radiology the proportion of women as first  
101 author increased from 8% in 1978 to 32% in 2013 and senior author increased from 7% in 1978 to  
102 22% in 2013[23]. Similarly, in gastroenterology the proportion of women as first author increased  
103 from 9% in 1992 to 29% in 2012, and senior author increased from 5% in 1992 to 15% in 2012[14].



The profile of gender equity in higher education and research has been raised by the introduction of Athena SWAN-linked funding incentives by the NIHR[26–28]. While Athena SWAN awards are useful markers of achievement for higher education institutions and research institutes, they alone are insufficient to assess and monitor the progress of NIHR BRCs towards gender equity[29]. Currently, the proportion of women and the rate of their achievements are not tracked routinely by the NIHR BRCs and little is known about how much women contribute to scientific research and innovation in the BRCs. It is important to inform the acceleration of women’s advancement and leadership in translational research in line with the stated objectives of the NIHR within the UK and RRI within the wider European research area through the collection of gender-disaggregated bibliometric data and analysis of scientific authorship by gender.

For addressing the paucity of empirical research on women’s advancement and leadership in translational research in the UK and Europe, a recent study on gender equity in Neurology suggests the need for institutions to take a systematic approach to addressing gender disparities that involve customised, defined metrics and transparent reporting to stakeholders[30].

The aim of this study was to assess the gender parity in six types of scientific authorship in biomedical research.

## METHODS

### *Study design*

A retrospective descriptive study.

### *Setting*

This study was conducted at the NIHR Oxford BRC, which is research collaboration between the Oxford University Hospitals NHS Foundation Trust and the University of Oxford[31]. The aim of NIHR BRCs is to support translational research and innovation to improve healthcare for patients[32]. During the study period (April 2012-March 2017), the NIHR Oxford BRC was awarded £96m to support research across nine research themes, five cross-cutting themes, and a range of underpinning platforms. The research themes included Blood, Cancer, Cardiovascular, Dementia and Cerebrovascular Disease, Diabetes, Functional Neuroscience and Imaging, Infection, Translational Physiology, and Vaccines. The crosscutting themes included Genomic Medicine, Immunity and Inflammation, Surgical Innovation and Evaluation, Biomedical Informatics and Technology, and Prevention and Population Care. The major underpinning platforms included a Biorepository, Education and Training, Public Engagement, and Research Governance. It is a contractual requirement to report the number of BRC supported publications published by researchers funded or supported by the NIHR research funds on an annual basis. Additionally, the NIHR uses bibliometric analyses to inform eligibility for NIHR funding[33,34]. This study was carried out as part of a wider programme of research on the markers of achievement for assessing and monitoring gender equity in translational research organisations[29].



## **Data**

Data comprised translational research publications published by researchers funded or supported by the NIHR Oxford BRC. The eligibility criteria for inclusion of a publication were funding or support by the NIHR Oxford BRC and publication between April 2012 and March 2017. Based on these criteria, 2409 publications were identified. These publications were classified as: basic science studies, clinical studies (both trial and non-trial studies), and other studies (comments, editorials, systematic reviews, reviews, opinions, meeting reports, guidelines and protocols).

## **Main outcome measures**

The main outcome measures were: (1) Gender of authors, defined as a binary variable comprising, either male or female categories, (2) Six categories of scientific authorship: first author, joint first authors, first corresponding author, joint corresponding authors, last author and joint last authors (Figure 1). These categories are conventionally associated with the highest amount of contribution, credit and prestige[10,17].

First author was defined as the first-named author of the publication. Publications that consisted of single authors were categorised as first authors. We considered the first author to be the main intellectual contributor in the publication, in terms of study design, data collection and analysis, and manuscript writing. Joint first authors were defined as two or more authors who were named as equal contributors and mentioned as joint first authors of the publication. The first corresponding author was defined as the only author who was reported as a corresponding author in the publication and his/her contact details such as an institutional address and/or an email address were provided for correspondence in the publication. Joint corresponding authors were defined as two or more authors who were listed or marked as corresponding authors and their contact details were provided for correspondence in the publication. Last author was defined as the last-named author of a publication. The last author was considered to be a group leader or principal investigator who may have provided significant intellectual contribution or supervision of the research work as well as acquisition of research funding[17,35]. Joint last authors were defined as two or more authors who were named as equal contributors in the publication and their names were mentioned as joint last authors in the publication. A major confounding factor, for which we could not control, was the informal nature of the conventions for the sequence and role of authors[35]. Although conventions for scientific authorship are well established in biomedical sciences[36,37], they may vary between different research areas and even between different research groups within the same area.

## **Determination of gender of authors**

The gender of the authors was defined as a binary variable comprising either male or female categories, which were determined based on the first name of authors in all six categories of authorship included in the analysis. When the first names of authors were initialled in the publication or were difficult to associate with either male or female gender, further information was sought through searching their institutional webpages and online social network sites such as the LinkedIn and ResearchGate. We also used the Gender API ([gender-api.com](http://gender-api.com)) when it was not possible to ascertain the gender of the authors by the above-mentioned sources. In addition, we contacted five authors directly via email to ascertain their gender. After completing data coding by two researchers (MJM and RD), to ensure the accuracy of data coding, 10% of the data were checked



independently (CH). Consensus was achieved through discussion between the researchers on data fields that did not match the assigning of the gender of authors and types of authorship (Figure 1).

### **Statistical analysis**

Data were analysed using frequencies including counts and percentages. Chi-square tests were used for identifying statistically significant differences and associations between male and female authors in various categories of authorship. The level of significance was set at  $p < 0.05$ . Data were analysed using the IBM SPSS Statistics for Windows, Version 25.0 (Armonk, NY: IBM Corp.).

### **Patient and public involvement statement**

There was no patient or public involvement in the study design.

## **RESULTS**

### **Type of research study**

Table 1 presents an overview of the types of research studies by year. Clinical research studies (both trial and non-trial studies) comprised 39% ( $n=939$ ), basic science research 27% ( $n=643$ ) and a third of publications (34%,  $n=827$ ) included other types of research, such as systematic reviews, reviews, research protocols, editorials, guidelines, opinions, comments, and meeting reports.

**Table 1** Number of publications by year of acceptance and types of research studies

| Year<br>(Accepted) | Types of research studies<br>Count (%) |                   |                                 |                   | Total Count<br>(%) |
|--------------------|----------------------------------------|-------------------|---------------------------------|-------------------|--------------------|
|                    | Basic<br>science                       | Clinical<br>trial | Clinical study -<br>Not a trial | Other*            |                    |
| 2012†              | 75 (27.6)                              | 18 (6.6)          | 90 (33.1)                       | 89 (32.7)         | 272 (100)          |
| 2013‡              | 151 (28.2)                             | 27 (5.0)          | 183 (34.2)                      | 174 (32.5)        | 535 (100)          |
| 2014‡              | 122 (22.2)                             | 29 (5.3)          | 204 (37.2)                      | 194 (35.3)        | 549 (100)          |
| 2015‡              | 137 (24.7)                             | 48 (8.7)          | 158 (28.5)                      | 211 (38.1)        | 554 (100)          |
| 2016‡              | 137 (31.8)                             | 31 (7.2)          | 120 (27.8)                      | 143 (33.2)        | 431 (100)          |
| 2017‡              | 21 (30.9)                              | 5 (7.4)           | 26 (38.2)                       | 16 (23.5)         | 68 (100)           |
| <b>Total</b>       | <b>643 (26.7)</b>                      | <b>158 (6.6)</b>  | <b>781 (32.4)</b>               | <b>827 (34.3)</b> | <b>2409 (100)</b>  |

†April-December, ‡January-December ‡January-March, \*systematic reviews, reviews, research protocols, editorials, guidelines, opinions, comments, and meeting reports

### **Authorship type and Gender**

Table 2 presents an overview of gender of authors by types of authorship. This highlights that male authors were statistically significant more likely to be first authors (59%,  $\chi^2$  972.938,  $P < 0.001$ ), first corresponding authors (66%,  $\chi^2$  242.970,  $P < 0.001$ ) and last authors (77%,  $\chi^2$  702.411,  $P < 0.001$ ) (Table 2). Furthermore, analyses of joint authorship categories revealed that the proportion of 'female only' authors was statistically significantly lower than 'male only' authors in the joint corresponding authors (29%,  $\chi^2$  79.858,  $P < 0.001$ ) and joint last authors categories (10%,  $\chi^2$  56.550,



P<0.001) (Table 2). However, in the joint first authors category, the proportion of ‘male and female’ as joint first authors (57%,  $\chi^2$  128.467, P <0.001) was statistically significantly higher than male only and female only first authors (Table 2).

**Table 2.** Authorship categories and gender of authors

| Authorship type<br>Number of publications in the category | Gender of authors<br>Count (%) |             |                 | Chi-Square Test<br>$\chi^2$ (p) |
|-----------------------------------------------------------|--------------------------------|-------------|-----------------|---------------------------------|
|                                                           | Male only                      | Female only | Male and female |                                 |
| First author (n=2407)                                     | 1413 (58.7)                    | 994 (41.3)  | N/A *           | 72.938 (<0.001)                 |
| First corresponding author (n=2371)                       | 1565 (66)                      | 806 (34)    | N/A             | 242.970 (<0.001)                |
| Last author (n=2406)                                      | 1853 (77)                      | 553 (23)    | N/A             | 702.411 (<0.001)                |
| Joint first authors (n=458)                               | 127 (27.7)                     | 69 (15.1)   | 262 (57.2)      | 128.467 (<0.001)                |
| Joint corresponding authors (n=169)                       | 107 (63.3)                     | 49 (29)     | 13 (7.7)        | 79.858 (<0.001)                 |
| Joint last authors (n=229)                                | 108 (47.2)                     | 23 (10)     | 98 (42.8)       | 56.550 (<0.001)                 |

\*N/A= not applicable.

### ***Gender of authors by type of research studies***

Analysis of gender of authors by types of research studies (i.e. basic science, clinical trials, non-trial clinical studies and other research) showed that the proportions of male only authors were statistically significantly higher than the proportions of female only authors in three authorship categories: first authors ( $\chi^2$  8.606 (df 3), P = 0.035), first corresponding authors ( $\chi^2$  36.955 (df 9), P < 0.001) and last authors ( $\chi^2$  10.314 (df 3), P = 0.016). The analysis by type of research studies also revealed that there were no significant differences between the proportions of male only and female only authors in all three joint authorship categories: joint first authors ( $\chi^2$  5.549 (df 6), P = 0.476), joint corresponding authors ( $\chi^2$  9.021 (df 6), P = 0.172) and joint last authors ( $\chi^2$  8.433 (df 6), P = 0.208).

### ***Yearly trends in Authorship by gender***

Figure 2 presents the yearly trends in scientific authorship by gender. In all authorship types and across all five years of publication, the proportion of male and female authors varied (Figure 2). The analysis showed women were significantly underrepresented across all years and authorship types. Interestingly, joint first authorship indicated a higher proportion of ‘male and female’ authors compared to ‘male only’ and ‘female only’ authors (Figure 2).



## *Association between same gender across authorship categories*

There was a statistically significant association between the same gender in first authorship and corresponding authorship categories ( $\chi^2$  775.425 (df 3),  $P < 0.001$ ) and the first author and joint first authors ( $\chi^2$  138.849 (df 2),  $P < 0.001$ ).

Furthermore, there were statistically significant associations between the same gender in the last author category with the same gender of first author(s) ( $\chi^2$  33.742 (df 2),  $P < 0.001$ ), corresponding author(s) ( $\chi^2$  540.774 (df 1),  $P < 0.001$ ) and joint last authors ( $\chi^2$  91.291 (df 2),  $P < 0.001$ ). However, there was no statistically significant association between the male and female last authors with the respective gender of joint first authors ( $\chi^2$  4.29 (df 2),  $P = 0.117$ ).

## **DISCUSSION**

We retrospectively analysed the gender parity of authors in six categories of authorship of scientific publications that were published over a five-year period. Our analysis shows that the number of female authors were underrepresented across all six categories of authorship [10,38,39].

In the first author category the proportions of female authors and male authors were within the 40%-60% "gender balance zone"[6]. The greatest gender imbalance was observed in the last author category where 'female only' authors comprised only 23%. Nonetheless, this proportion is higher than other studies reporting similar analyses[11,16,24].

To the best of our knowledge, this study presents the first analysis of joint authorship in three categories. Secondly, it demonstrates underrepresentation in female only authors in six categories of scientific authorship[40]. Thirdly, the analysis highlights gender inequity with female underrepresentation in prestigious authorship positions compared to male in biomedical research. This is consistent with other fields including: epilepsy, lung cancer, dermatology, eating disorders and in medicine in general[17,19,41–43].

This study extends understanding of gender-based trends in scientific authorship (Figure2) by showing encouraging incremental changes in gender parity in authorship in a biomedical research setting. Previous research examined the gender gap in authorship within the medical literature reporting an upward trend for female first authors from 6% in 1970 to 29% in 2004 and female last authors from 4% in 1970 to 19% 2004. However, it was limited to US based institutions[12]. A similar UK based study covering the same period (i.e. 1970-2004) also showed upward trends for female first authors increasing from 11% in 1970 to 37% in 2004 and female last authors from 12% in 1970 to 17% in 2004[24]. In addition, a recent study by Filardo et al.[16] examined the prevalence of female first authorship of original research published in six high impact general medical journals between February 1994 and June 2014 revealed that the adjusted probability of an article having a female first authorship increased significantly from 27% in 1994 to 37% in 2014[16]. However, despite the proportion of female first authors varied greatly by journal, men were generally more likely to be first authors than women[16]. Compared to previous studies mentioned above, our study provides evidence of higher and increasing gender equity in the first authors, last authors and other four categories of scientific authorship in biomedical research (Table 2).



Our study identified a strong association between same gender and authorship types showing if the first author of a publication was male, it was highly likely that the first corresponding author of the same publication would also be male. Similarly, the likelihood of the first author being female was higher, if the first corresponding author was also female[44]. Likewise, there appeared to be a significant association of male and female last authors with the respective gender of first authors. Previous research has highlighted males and females were more likely to be first authors on papers if the last authors were of the same gender; however, these were not conducted in a translational research setting[23,45–47]. There was also a strong association of male and female last authors with the respective gender of corresponding authors[44].

However, due to the differences in gender equity between different research areas and medical specialties, where a centre-specific mix of research themes is likely to influence gender equity in scientific authorship, it is difficult to make direct comparisons across the literature.

Overall, our results build an important evidence base in biomedical research settings concerning gender parity and support the findings from previous studies where analysis of scientific authorship by gender has been used as an important marker of gender equity[12,24,48–50].

### ***Implications for policy and practice***

While NIHR BRCs routinely collect bibliometric data on publications arising from the NIHR-funded research, and report to the NIHR (the funder), to the best of our knowledge, this data is not routinely analysed by gender. Our study supports the feasibility of using NIHR BRCs funded or supported research publications for analysing scientific authorship by gender. While retrospective analysis of the gender of authors in scientific publications is labour-intensive and has limitations, there is an opportunity to begin to track this prospectively. As more data becomes available, this would enable longitudinal analysis of scientific authorship by gender, which could be useful for tracking progress towards gender equity and related issues such as markers of achievement across all NIHR BRCs.

In addition, since the acceleration of women’s advancement and leadership in translational research is one of the stated objectives of the NIHR, investigating the extent of gender equity in scientific authorship may usefully inform strategies to accelerate women’s advancement and leadership in NIHR-funded research. Moreover, bibliometric analyses used by the NIHR to inform competition for NIHR funding may incorporate the gender dimension into the analysis, which could provide additional information on the competitiveness for NIHR funding[51,52].

## **CONCLUSION**

Our results show that while first authorship is within the 40%-60% gender balance zone, a greater gender disparity is prevalent in other types of scientific authorship in biomedical research. The proportion of female authors is significantly lower than the proportion of male authors in all six categories of authorship included in our analysis. This study also demonstrates the feasibility of analysing scientific authorship by gender, which could provide useful insight about gender equity in scientific publications, which may be a useful marker of achievement. Overall, our study demonstrates that it is feasible to analyse the available bibliometric data on publications arising



from NIHR funding by gender and consider establishing processes for analysing gender equity in scientific authorship over time.

## Contributors

LDE conceived the study. RD and MJM coded the data. SGSS analysed the data. RD and SGSS drafted the manuscript. PVO contributed to the conception of the study and co-wrote parts of the manuscript. CRH and OC participated in data collection. VK, LRH, and AMB contributed to the conception of the study, facilitated access to the publications and coordinated the study. All authors read, contributed to and approved the final manuscript.

## Funding

This study is funded by the European Union's Horizon 2020 research and innovation programme award STARBIOS2 under grant agreement No. 709517 and by the National Institute for Health Research (NIHR) Oxford Biomedical Research Centre, grant BRC-1215-20008 to the Oxford University Hospitals NHS Foundation Trust and the University of Oxford. The views expressed are those of the authors and not necessarily those of the NHS, the NIHR, or the Department of Health and Social Care.

## Competing interests

VK is Chief Operating Officer and LRH is Clinical Research Manager at the National Institute for Health Research (NIHR) Biomedical Research Centre, Oxford. AMB is a senior medical science advisor and co-founder of Brainomix, a company that develops electronic ASPECTS (e-ASPECTS), an automated method to evaluate ASPECTS in stroke patients. MJM, LDE and PVO were funded by STARBIOS2 and the National Institute for Health Research (NIHR) Oxford Biomedical Research Centre (BRC). PVO is a member of the NIHR Advisory Group on Equality, Diversity, and Inclusion, a member of the European Association of Science Editors Gender Policy Committee, and a member of the Athena SWAN Self-Assessment Team of the Radcliffe Department of Medicine, University of Oxford. The other authors declare no competing interests.

## Ethics

The University of Oxford Clinical Trials and Research Governance Team reviewed the study and deemed it exempt from full ethics review on the grounds that it falls outside of the Governance Arrangements for Research Ethics Committees (GfREC), which stipulate which research studies are required to have ethics review. A wider programme of research on the activities of the NIHR Oxford Biomedical Research Centre from 2017 to 2022 received ethics clearance through the University of Oxford Central University Research Ethics Committee (R51801/ RE001), the Health Research Authority (IRAS ID 228049) and the Oxford University Hospitals NHS Foundation Trust Management (PID 12779).

## Acknowledgements

The authors wish to thank Professor Helen McShane for reviewing the draft manuscript and making comments and suggestions for improving it.



## Patient consent for publication

Not required.

## Data sharing statement

No additional data available.

## REFERENCES

- 1 Colizzi V, Mezzana D, Ovseiko P V., *et al.* Structural transformation to attain responsible BIOSciences (STARBIOS2): Protocol for a horizon 2020 funded European multicenter project to promote responsible research and innovation. *J Med Internet Res* 2019;**21**. doi:10.2196/11745
- 2 Elster D, Barendziak T, Birkholz J. Towards a Sustainable and Open Science: Recommendations for Enhancing Responsible Research and Innovation in the Biosciences at the University of Bremen. 2019. <http://elib.suub.uni-bremen.de/edocs/00107721-1.pdf>
- 3 European Commission. Indicators for promoting and monitoring Responsible Research and Innovation. Report from the Expert Group on Policy Indicators for Responsible Research and Innovation. 2015.
- 4 European Commission. DIRECTIVE OF THE EUROPEAN PARLIAMENT AND OF THE COUNCIL on improving the gender balance among non-executive directors of companies listed on stock exchanges and related measures. Published Online First: 2012.<http://eur-lex.europa.eu/LexUriServ/LexUriServ.do?uri=COM:2012:0614:FIN:en:PDF>
- 5 European Commission. Report on Equality between Women and Men in the European Union. 2019;:1–78. doi:10.2838/776419
- 6 Kuhlmann E, Ovseiko P V., Kurmeyer C, *et al.* Closing the gender leadership gap: A multi-centre cross-country comparison of women in management and leadership in academic health centres in the European Union. *Hum Resour Health* 2017;**15**:1–7. doi:10.1186/s12960-016-0175-y
- 7 European Institute for Gender Equality. Gender parity. 2020.<https://eige.europa.eu/thesaurus/terms/1195> (accessed 19 Feb 2020).
- 8 Rexrode KM. The gender gap in first authorship of research papers. *BMJ* 2016;**1130**:1–2. doi:10.1136/bmj.i1130
- 9 Bloch C, Graversen EK, Pedersen HS. Competitive Research Grants and Their Impact on Career Performance. *Minerva* 2014;**52**:77–96.
- 10 Bendels, M, Muller, R, Brueggmann, D, Groneberg D. Gender disparities in high-quality research revealed by Nature Index journals. *PLoS One* 2018;**13**:1–21.
- 11 Jefferson L, Bloor K, Maynard A. Women in medicine: Historical perspectives and recent trends. *Br Med Bull* 2015;**114**:5–15. doi:10.1093/bmb/ldv007
- 12 Jaggi, R, Guancial, E, Worobey, C, Henault, L, Chang, Y, Starr, R, Tarbell, N, Hylek E. The “Gender Gap” in Authorship of Academic Medical Literature — A 35-Year Perspective. *N Engl*



377 *J Med* 2006;**355**:281–7.

378 13 Mueller CM, Gaudilliere DK, Kin C, *et al.* Gender disparities in scholarly productivity of US  
379 academic surgeons. *J Surg Res* 2016;**203**:28–33. doi:10.1016/j.jss.2016.03.060

380 14 Long MT, Leszczynski A, Thompson KD, *et al.* Female authorship in major academic  
381 gastroenterology journals: A look over 20 years. *Gastrointest Endosc* 2015;**81**:1440-1447.e3.  
382 doi:10.1016/j.gie.2015.01.032

383 15 Fishman M, Williams WA, Goodman DM, *et al.* Gender Differences in the Authorship of  
384 Original Research in Pediatric Journals, 2001-2016. *J Pediatr* 2017;**191**:244-249.e1.  
385 doi:10.1016/j.jpeds.2017.08.044

386 16 Filardo G, Graca B, Sass DM, *et al.* Trends and comparison of female first authorship in high  
387 impact medical journals: observational study ( 1994-2014 ). *BMJ* 2016;**352**:1–8.  
388 doi:10.1136/bmj.i847

389 17 Bendels, Michael, Wanke, Eileen, Schoffel, Norman, Bauer, J, Quarcoo, David and Groneberg  
390 D. Gender equality in academic research on epilepsy — a study on scientific authorships.  
391 *Epilepsia* 2017;**58**:1794–802. doi:10.1111/epi.13873

392 18 Bendels MHK, Brüggmann D, Schöffel N, *et al.* Gendermetrics of cancer research: results  
393 from a global analysis on lung cancer. *Oncotarget* 2017;;1–11.

394 19 Bendels MHK, Dietz MC, Brüggmann D, *et al.* Gender disparities in high-quality dermatology  
395 research: a descriptive bibliometric study on scientific authorships. *BMJ Open* 2018;**8**:1–11.  
396 doi:10.1136/bmjopen-2017-020089

397 20 Bendels MHK, Brüggmann D, Schöffel N, *et al.* Gendermetrics of cancer research: Results  
398 from a global analysis on prostate cancer. *Oncotarget* 2018;**9**:19640–9.  
399 doi:10.18632/oncotarget.24716

400 21 Sing DC, Jain D, Ouyang D. Gender trends in authorship of spine-related academic literature  
401 — a 39-year perspective. *Spine J* 2017;**17**:1749–54. doi:10.1016/j.spinee.2017.06.041

402 22 Schisterman EF, Swanson CW, Lu Y, *et al.* The changing face of epidemiology: gender  
403 disparities in citations? *Epidemiology* 2017;**28**:159–68.  
404 doi:10.1097/EDE.0000000000000593.The

405 23 Piper CL, Scheel JR, Lee CI, *et al.* Gender trends in radiology authorship: A 35-year analysis.  
406 *Am J Roentgenol* 2016;**206**:3–7. doi:10.2214/AJR.15.15116

407 24 Sidhu R, Rajashekhar P, Lavin VL, *et al.* The gender imbalance in academic medicine: A study  
408 of female authorship in the United Kingdom. *J R Soc Med* 2009;**102**:337–42.  
409 doi:10.1258/jrsm.2009.080378

410 25 Sing DC, Jain D, Ouyang D. Gender trends in authorship of spine-related academic literature—  
411 a 39-year perspective. *Spine J* 2017;**17**:1749–54. doi:10.1016/j.spinee.2017.06.041

412 26 Ovseiko P V., Chapple A, Edmunds LD, *et al.* Advancing gender equality through the Athena  
413 SWAN Charter for Women in Science: An exploratory study of women’s and men’s  
414 perceptions. *Heal Res Policy Syst* 2017;**15**:1–13. doi:10.1186/s12961-017-0177-9

415 27 Ovseiko P V., Pololi LH, Edmunds LD, *et al.* Creating a more supportive and inclusive university



416 culture: a mixed-methods interdisciplinary comparative analysis of medical and social  
417 sciences at the University of Oxford. *Interdiscip Sci Rev* 2019;**44**:166–91.  
418 doi:10.1080/03080188.2019.1603880

419 28 Schmidt EK, Ovseiko P V, Henderson LR, *et al.* Understanding the Athena SWAN award  
420 scheme for gender equality as a complex social intervention in a complex system: analysis of  
421 Silver award action plans in a comparative European perspective. *bioRxiv* 2019;;555482.  
422 doi:10.1101/555482

423 29 Ovseiko, PV, Edmunds, LD, Pololi, LH et al. Markers of achievement for assessing and  
424 monitoring gender equity in translational research organisations: a rationale and study  
425 protocol. *BMJ Open* 2016;**6**:1–11. doi:10.1136/bmjopen-2015-009022

426 30 Silver JK. Understanding and addressing gender equity for women in neurology. *Neurology*  
427 2019;**93**:538–49. doi:10.1212/WNL.00000000000008022

428 31 NIHR Oxford BRC. About the NIHR Oxford Biomedical Research Centre.  
429 2019.<https://oxfordbrc.nihr.ac.uk/about-us-intro/> (accessed 19 Dec 2019).

430 32 Greenhalgh T, Ovseiko P V., Fahy N, *et al.* Maximising value from a United Kingdom  
431 Biomedical Research Centre: study protocol. *Heal Res policy Syst* 2017;**15**:70.  
432 doi:10.1186/s12961-017-0237-1

433 33 Gunashekar S, Parks S, Calero-Medina C, *et al.* Bibliometric analysis of highly cited  
434 publications of biomedical and health research in England, 2004--2013. *Bibliometric Anal*  
435 *highly cited Publ Biomed Heal Res England, 2004--2013* 2016;;83.  
436 doi:<https://doi.org/10.7249/RR1363>

437 34 Gunashekar S, Wooding S, Guthrie S. How do NIHR peer review panels use bibliometric  
438 information to support their decisions? *Scientometrics* 2017;**112**:1813–35.  
439 doi:10.1007/s11192-017-2417-8

440 35 Tschartke T, Hochberg ME, Rand TA, *et al.* Author sequence and credit for contributions in  
441 multi-authored publications. *PLoS Biol* 2007;**5**:0013–4. doi:10.1371/journal.pbio.0050018

442 36 Wren JD, Kozak KZ, Johnson KR, *et al.* The write position. A survey of perceived contributions  
443 to papers based on byline position and number of authors. *EMBO Rep* 2007;**8**:988–91.  
444 doi:10.1038/sj.embor.7401095

445 37 ICMJE. Defining the Role of Authors and Contributors.  
446 2019.[http://www.icmje.org/recommendations/browse/roles-and-responsibilities/defining-](http://www.icmje.org/recommendations/browse/roles-and-responsibilities/defining-the-role-of-authors-and-contributors.html)  
447 [the-role-of-authors-and-contributors.html](http://www.icmje.org/recommendations/browse/roles-and-responsibilities/defining-the-role-of-authors-and-contributors.html) (accessed 23 Dec 2019).

448 38 Holman L, Stuart-fox D, Hauser CE. The gender gap in science: How long until women are  
449 equally represented? *PLoS Biol* 2018;**16**:1–20. doi:10.1371/journal.pbio.2004956

450 39 UNESCO. Women in Science. Fact Sheet. 2018.

451 40 Broderick NA, Casadevall A. Gender inequalities among authors who contributed equally.  
452 *Elife* 2019;**8**:1–11. doi:10.7554/eLife.36399

453 41 Bendels MHK, Bruggmann D SN et al. Gendermetrics of cancer research: results from a global  
454 analysis on lung cancer. *Oncotarget* 2017;;1–11.



- 455 42 Strand M, Bulik CM. Trends in female authorship in research papers on eating disorders: 20-  
456 year bibliometric study. *BJPsych Open* 2018;**4**:39–46. doi:10.1192/bjo.2017.8
- 457 43 Gayet-Ageron A, Poncet A, Perneger T. Comparison of the contributions of female and male  
458 authors to medical research in 2000 and 2015: A cross-sectional study. *BMJ Open* 2019;**9**:1–8.  
459 doi:10.1136/bmjopen-2018-024436
- 460 44 Ouyang, D, Harrington, RA., Rodriguez F. Association Between Female Corresponding Authors  
461 and Female Co-Authors in Top Contemporary Cardiovascular Medicine Journals. *Circ Am Hear*  
462 *Assoc* 2019;**139**:1127–9. doi:10.1161/CIRCULATIONAHA.118.037763
- 463 45 Fox CW, Burns CS, Muncy AD, *et al.* Gender differences in patterns of authorship do not affect  
464 peer review outcomes at an ecology journal. *Funct Ecol* 2016;**30**:126–39. doi:10.1111/1365-  
465 2435.12587
- 466 46 Salerno PE, Páez-Vacas M, Guayasamin JM, *et al.* Male principal investigators (almost) don't  
467 publish with women in ecology and zoology. *PLoS One* 2019;**14**:1–14.  
468 doi:10.1371/journal.pone.0218598
- 469 47 Edwards HA, Schroeder J, Dugdale HL. Correction: Gender differences in authorships are not  
470 associated with publication bias in an evolutionary journal(PLoS ONE (2019)13:8  
471 (e0201725)Doi:10.1371/journal.pone.0201725). *PLoS One* 2019;**14**:1–16.  
472 doi:10.1371/journal.pone.0217251
- 473 48 Bendels MHK, Müller R, Brueggmann D, *et al.* Gender disparities in high-quality research  
474 revealed by nature index journals. *PLoS One* 2018;**13**:1–21.  
475 doi:10.1371/journal.pone.0189136
- 476 49 Feramisco JD, Leitenberger JJ, Redfern SI, *et al.* A gender gap in the dermatology literature?  
477 Cross-sectional analysis of manuscript authorship trends in dermatology journals during 3  
478 decades. *J Am Dermatology* 2009;**60**:63–9. doi:10.1016/j.jaad.2008.06.044
- 479 50 Bhattacharyya N, Shapiro NL. Increased Female Authorship in Otolaryngology Over the Past  
480 Three Decades. *Laryngoscope* 2000;**110**:358–61. doi:10.1097/00005537-200003000-00005
- 481 51 Van Leeuwen T, Hoorens S, Grant J. Using bibliometrics to support the procurement of NIHR  
482 biomedical research centres in England. *Res Eval* 2009;**18**:71–82.  
483 doi:10.3152/095820209X414178
- 484 52 Leeuwen T Van, Grant J. Bibliometric analysis of highly cited publications of health research in  
485 England, 1995-2004. 2007. [https://www.rand.org/pubs/working\\_papers/WR368.html](https://www.rand.org/pubs/working_papers/WR368.html)

## 486 Additional files list

487 **Figure 1** Publication analysis workflow. The workflow shows the process of extracting data according  
488 to gender from six types of authorship.

489 **Figure 2** Yearly trends in scientific authorship by gender (male and female), April 2012 - March 2017.  
490 This plot represents the yearly variation of the proportion of male and female authors according to  
491 six types of authorship between the years of publication/acceptance from 2012 to 2017.



# Supplementary File 1

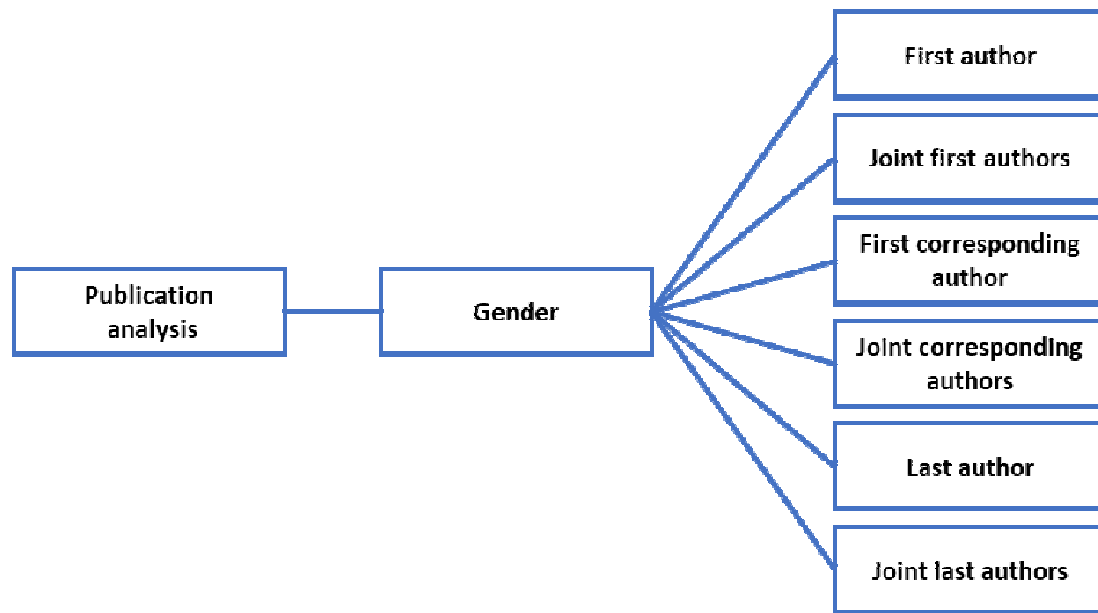

**Figure 1** Publication analysis workflow.
